# Supplementary material for: Photodynamic Effects with 5-Aminolevulinic Acid on Cytokines and Exosomes in Human Peripheral Blood Mononuclear Cells
Source: MDPI journal article supplement (doi:10.3390/biomedicines10020232), 2022-01-21
Supplement: s1 [file s1]

## Supplementary Data

**Table S1. Intracellular PpIX in individual subsets of PBMCs after ALA incubation for 4 hours**

|                                          | PpIX increase (% of controls) |     |     |     |      |
|------------------------------------------|-------------------------------|-----|-----|-----|------|
|                                          | D1                            | D2  | D3  | D4  | Avg. |
| <b>CD3<sup>+</sup></b>                   | 260                           | 292 | 240 | 132 | 231  |
| <b>CD4<sup>+</sup></b>                   | 270                           | 417 | 275 | 113 | 269  |
| <b>CD8<sup>+</sup></b>                   | 29                            | 38  | 26  | 16  | 27   |
| <b>CD3<sup>+</sup>CD19<sup>+</sup></b>   | 536                           | 767 | 372 | 243 | 480  |
| <b>CD3<sup>+</sup>CD56<sup>+</sup></b>   | 304                           | 150 | 284 | 113 | 213  |
| <b>CD11c<sup>+</sup>CD14<sup>+</sup></b> | 327                           | 357 | 332 | 55  | 268  |

Note: **D1**: donor sample 1; **Avg.**: average data of 4 samples from 4 different donors.  
The same abbreviations for Tables 2-5.

**Table S2. ALA dark cytotoxicity in subsets of PBMCs after ALA incubation for 4 hours**

|                                          | Cell viability (% of controls without ALA) |     |    |     |      |
|------------------------------------------|--------------------------------------------|-----|----|-----|------|
|                                          | D1                                         | D2  | D3 | D4  | Avg. |
| <b>CD3<sup>+</sup></b>                   | 90                                         | 110 | 95 | 95  | 98   |
| <b>CD4<sup>+</sup></b>                   | 95                                         | 111 | 99 | 89  | 98   |
| <b>CD8<sup>+</sup></b>                   | 80                                         | 119 | 94 | 87  | 95   |
| <b>CD3<sup>+</sup>CD19<sup>+</sup></b>   | 66                                         | 81  | 83 | 94  | 81   |
| <b>CD3<sup>+</sup>CD56<sup>+</sup></b>   | 12                                         | 12  | 57 | 45  | 32   |
| <b>CD11c<sup>+</sup>CD14<sup>+</sup></b> | 93                                         | 96  | 61 | 114 | 91   |

**Table S3. Killing effects on individual subsets of PBMCs after PDT with ALA**

|                                          | <b>Cell viability (% of controls with ALA alone)</b> |           |           |           |             |
|------------------------------------------|------------------------------------------------------|-----------|-----------|-----------|-------------|
|                                          | <b>D1</b>                                            | <b>D2</b> | <b>D3</b> | <b>D4</b> | <b>Avg.</b> |
| <b>CD3<sup>+</sup></b>                   | 74                                                   | 82        | 42        | 87        | 71          |
| <b>CD4<sup>+</sup></b>                   | 47                                                   | 28        | 16        | 73        | 41          |
| <b>CD8<sup>+</sup></b>                   | 74                                                   | 92        | 55        | 83        | 76          |
| <b>CD3<sup>-</sup>CD19<sup>+</sup></b>   | 10                                                   | 11        | 7         | 22        | 13          |
| <b>CD3<sup>-</sup>CD56<sup>+</sup></b>   | 21                                                   | 9         | 1         | 21        | 13          |
| <b>CD11c<sup>+</sup>CD14<sup>+</sup></b> | 34                                                   | 20        | 45        | 30        | 32          |

**Table S4. PDT effect on cytokines with ALA**

|            | Log decrease |      |      |      |      |
|------------|--------------|------|------|------|------|
|            | D1           | D2   | D3   | D4   | Avg. |
| MIP-1alpha | 14,2         | 17,3 | 16,0 | 15,5 | 16,1 |
| MIP-1beta  | 13,3         | 13,8 | 14,1 | 13,7 | 13,7 |
| IL-6       | 7,0          | 13,6 | 14,4 | 14,1 | 13,7 |
| G-CSF      | 10,0         | 12,0 | 10,3 | 10,6 | 10,9 |
| IFN-gamma  | 3,9          | 9,5  | 9,1  | 9,6  | 9,0  |
| IL4        | 5,5          | 8,5  | 9,6  | 8,5  | 8,6  |
| PDGF-BB    | 9,2          | 7,1  | 5,7  | 8,8  | 8,2  |
| IL9        | 8,0          | 6,8  | 9,1  | 6,1  | 7,9  |
| IL-1ra     | 0,0          | 6,6  | 7,8  | 7,1  | 6,8  |
| IL-5       | 5,8          | 6,0  | 7,6  | 6,5  | 6,7  |
| IL-15      | 4,9          | 5,3  | 6,0  | 4,9  | 5,4  |
| IL-12(p70) | 0,0          | 3,9  | 4,2  | 3,9  | 3,6  |

**Table S5. PDT effect on exosomes with ALA**

|            | Log decrease |      |     |     |      |
|------------|--------------|------|-----|-----|------|
|            | D1           | D2   | D3  | D4  | Avg. |
| CD29       | 8,6          | 10,0 | 9,7 | 9,1 | 9,4  |
| CD9        | 7,5          | 9,0  | 9,1 | 9,0 | 8,8  |
| CD40       | 6,8          | 8,1  | 8,9 | 5,5 | 7,8  |
| CD31       | 6,5          | 8,2  | 8,4 | 5,3 | 7,6  |
| HLA-ABC    | 6,5          | 8,2  | 8,4 | 2,4 | 7,5  |
| CD41b      | 6,3          | 7,9  | 8,0 | 6,9 | 7,4  |
| CD69       | 6,7          | 7,3  | 8,6 | 3,5 | 7,4  |
| HLA-DRDPDQ | 6,1          | 8,1  | 7,7 | 4,3 | 7,1  |
| CD44       | 4,4          | 8,0  | 7,5 | 6,3 | 7,1  |
| CD81       | 5,5          | 7,1  | 6,9 | 6,1 | 6,5  |
| SSEA-4     | 6,2          | 6,4  | 7,4 | 5,0 | 6,5  |
| CD8        | 5,7          | 6,9  | 5,3 | 4,4 | 5,9  |
| CD25       | 2,9          | 5,6  | 6,4 | 4,2 | 5,3  |
| CD19       | 5,0          | 4,9  | 5,3 | 3,9 | 4,9  |
| CD4        | 3,5          | 3,5  | 5,2 | 4,6 | 4,4  |
| CD326      | 1,2          | 2,1  | 4,2 | 4,6 | 3,6  |
| CD133-1    | 4,2          | 0,0  | 3,0 | 2,8 | 3,1  |
